# Supplementary material for: Prevalence and determinants of non-adherence to Imatinib in the first 3-months treatment among newly diagnosed Ethiopian’s with chronic myeloid leukemia
Source: PubMed Central journal article supplement (PMC6405163; doi:10.1371/journal.pone.0213557), 2019-03-07
Supplement: pone.0213557.s001.pdf [file pone.0213557.s001.pdf]

# **Data Collection Tool**

## **Annex I: Structured Questionnaire**

### **Part I: English Version of Information Sheet**

Dear participant, Good Morning/Afternoon

#### **Introduction**

My name is \_\_\_\_\_. I am a member of the study that is carried out at Tikur Anbessa Specialized Hospital, Ambulatory Hematology Clinic; Addis Ababa, Ethiopia entitled “Prevalence and Determinants of Non-adherence to Imatinib in the First 3-Months among Newly Diagnosed Ethiopian Patients with Chronic Myeloid Leukemia”.

#### **Objective**

The main purpose of this study is to assess “Prevalence and Determinants of Non-adherence to Imatinib in the First 3-Months among Newly Diagnosed Ethiopian Patients with Chronic Myeloid Leukemia”. Your input will be extremely valuable as the information will be used to assess the medication use and adherence to identify gaps in treatment outcome.

#### **Expected Outcomes and/or Benefits**

At the end of the study, the adherence and factors associated with poor adherence will be evaluated. Therefore, the study will identify and investigate the main gaps and challenges associated with adherence and will propose the feasible recommendations and may benefit you directly or indirectly by improving the CML treatment in the hospital.

**Thank you so much in advance.**

## Part II: English Version of Informed Consent Form

Everything from your information and records would be completely confidential to the research and the data are stored without your name and only used for the purpose of this study. None of this would affect the care you receive from Hematology Ambulatory clinic of TASH, but will help in future planning for the hospital. No identifying names or characteristics will go into my report, so you may share your thoughts openly. Additionally, taking part in this study is completely voluntary. It is your choice whether to participate or not. You may skip any questions that you do not want to answer. Please ask me to stop as we go through the information and I will take time to explain. I would be grateful if you could sign the attached form to say you have no objections to our accessing any records and interviewing you. Would you be willing to assist me by having a 10-15 minutes’?

**If the interviewee responds “Yes”,** Please proceed and let him/her to sign or replies “No” gratitude him/her and quit the interview. If you have any questions concerning the study, please call Atalay Mulu (+251) 23295462.

\_\_\_\_\_

**Signature of respondent**                      **Signature of interviewer**

Date: \_\_\_\_\_ (Day/month/year)

Principal Investigator: Atalay Mulu

Addis Ababa University, CHS, School of Pharmacy, Department of

Pharmacology and Clinical Pharmacy

Email: [Atalay.mulu@aau.edu.et](mailto:Atalay.mulu@aau.edu.et)

### Part III: Data Collection form from Patient Interview

|                                                                                                                                                                                                                                                                                                                                                      |
|------------------------------------------------------------------------------------------------------------------------------------------------------------------------------------------------------------------------------------------------------------------------------------------------------------------------------------------------------|
| <b>Socio-Demographic Characteristics</b>                                                                                                                                                                                                                                                                                                             |
| Age: _____ (in years)                                                                                                                                                                                                                                                                                                                                |
| Sex:<br><input type="checkbox"/> Male <input type="checkbox"/> Female                                                                                                                                                                                                                                                                                |
| Marital Status<br><input type="checkbox"/> Single <input type="checkbox"/> Married <input type="checkbox"/> Divorced <input type="checkbox"/> Widowed/er                                                                                                                                                                                             |
| Educational Level<br><input type="checkbox"/> Can't read & write <input type="checkbox"/> Can read and write without formal education<br><input type="checkbox"/> Primary Education(1-8) <input type="checkbox"/> Secondary Education(9-12)<br><input type="checkbox"/> Diploma and Above <input type="checkbox"/> Others                            |
| Place of Residence<br><input type="checkbox"/> Addis Ababa <input type="checkbox"/> Out of Addis Ababa                                                                                                                                                                                                                                               |
| Region: _____ (Write in words where they are from)                                                                                                                                                                                                                                                                                                   |
| Occupation<br><input type="checkbox"/> Unemployed <input type="checkbox"/> House wife <input type="checkbox"/> Student<br><input type="checkbox"/> Farmer <input type="checkbox"/> Daily laborer <input type="checkbox"/> Employed<br><input type="checkbox"/> Merchant <input type="checkbox"/> Retired <input type="checkbox"/> Other(s) [Specify] |
| Monthly Income (ETB): _____ (Write in number)<br><input type="checkbox"/> Very Low ( $\leq$ 860 Birr) <input type="checkbox"/> Above average (3001-5000 Birr)<br><input type="checkbox"/> Low (861-1500 Birr) <input type="checkbox"/> High ( $\geq$ 5001 Birr)<br><input type="checkbox"/> Average (1501-3000Birr)                                  |

#### **Part IV: Adherence Assessment Tool**

Morisky Medication Adherence scale (8-item) was employed to measure adherence status.

#### **Part V: Reasons for Non-Adherence**

If the finding for the MMAS-8 score is  $<8$  (or any suspicion of things which affects adherence to treatment), what do you think are the factors?

- Unintentional (forgetfulness, carelessness)
- Intentional, due to lack of trust on the treatment (personnel beliefs about taking medication such as cultural beliefs)
- Costs other than medication price (transport cost, cost for home and bed accommodation while coming for medication refill)
- Hopelessness (consider taking medication lifelong while it is not cured)
- Lack of support from family or friend
- Lack of support from health professionals
- Distance from AA or hospital
- Others, specify\_\_\_\_\_

#### **Part VI: Safety of Imatinib**

**What are the adverse effects you faced due to your medication or review on patient chart?**

- Edema/Fluid retention
- Headache
- Nausea/Vomiting

- Fatigue                       Muscle pain                       Epigastric pain/Burning sensation  
 Rash                               Diarrhea                               Skin rash  
 Facial Puffiness                       Skin color change                       Others\_\_\_\_\_

**Based on answers provided in above, do the above adverse events affect your medication taking behavior?**  Yes       No

**If yes in question 3.4; how often did you miss your dose?**

- Never       Rarely       Sometimes       Often

## **Annex II: Data Abstraction format from Patient Chart**

### **Part I: Presence of Co-morbid Illnesses**

1. Are there any Co-morbid conditions other than CML?  Yes       No
2. If yes for question number 1, what type of co-morbid condition/s is this/are they?  
\_\_\_\_\_
3. Is there any medications taken by the patient? Please list all the medications  
\_\_\_\_\_

#### **I. Treatment History**

1. Did the Patient take hydroxyurea?  Yes       No
2. If yes for Qn no 1; dose, frequency and duration of treatment:-  
\_\_\_\_\_
3. Difference between confirmed diagnosis of CML and initiation of Imatinib, in weeks: \_\_\_\_\_

#### **4. Daily dose of Imatinib:**

- 300mg                       400mg                       600mg                       800mg

#### **5. About Regimen/dose change History**

- I.** Was the dose/ regimen changed?  Yes       No

**II. If yes to Qn No I,**

**When (after initiation of Imatinib in weeks)**\_\_\_\_\_

**Why?**

- a. Dose decreased, because the patient responds to the initial dose and changed to maintenance treatment.
- b. Dose decreased, because the patient didn't tolerate
- c. Dosed increased, because the patient didn't respond to current treatment
- d. Drug discontinued because patient fulfills for Imatinib discontinuation.

**6. If the answer is "d", Reasons for temporary treatment discontinuation**

\_\_\_\_\_

**7. For how long, treatment discontinued (In weeks)**\_\_\_\_\_

**8. Supportive managements given for the patient**

- 1. \_\_\_\_\_
- 2. \_\_\_\_\_
- 3. \_\_\_\_\_

**9. Follow up findings**

| <b>CBC</b>                                              | <b>At 2wks</b> | <b>At 1month</b> | <b>At 2-month</b> | <b>At 3-month</b> |
|---------------------------------------------------------|----------------|------------------|-------------------|-------------------|
| WBC x 10 <sup>3</sup> cells/ mm <sup>3</sup>            |                |                  |                   |                   |
| Neutrophil, %                                           |                |                  |                   |                   |
| ANC                                                     |                |                  |                   |                   |
| Lymphocyte, %                                           |                |                  |                   |                   |
| Basophils, %                                            |                |                  |                   |                   |
| Platelet count x 10 <sup>3</sup> cells/ mm <sup>3</sup> |                |                  |                   |                   |
| RBC x 10 <sup>6</sup> cells/ mm <sup>3</sup>            |                |                  |                   |                   |
| HCT, %                                                  |                |                  |                   |                   |
| Hgb, g/dl                                               |                |                  |                   |                   |
| <b>Clinical Findings</b>                                |                |                  |                   |                   |

|                                                      |  |  |  |  |
|------------------------------------------------------|--|--|--|--|
| Splenomegaly (Yes/No)                                |  |  |  |  |
| Hepatomegaly (Yes/No)                                |  |  |  |  |
| CHR status(Yes/No)                                   |  |  |  |  |
| Are/is there other clinical findings? If yes Specify |  |  |  |  |

Annex III: የአማርኛ መጠይቅ ቅፅ

**ቅጽ 1: የጥናቱ መረጃ ቅጽ**

ቀን: \_\_\_\_\_

ውድ የቃለ መጠይቅ ተሳታፊ፤ እንደምን አደሩ/ዋሉ? የጥናቱ መግቢያ ስሜ  
\_\_\_\_\_ ይባላል። በጥቁር አንበሳ ስፔሻላይዝድ ሆስፒታል  
ሄማቶሎጅ ክፍል ውስጥ በተመላላሽነት እንደ አዲስ Imatinib (Gleevec)  
የተባለውን መድኃኒት ለጀመሩ የCML ህመማን ስለ መድሀኒት አወሳሰድ እና  
የህክምና ውጤት ሁኔታ የ 3-ወር የክትትል የድህረ ምረቃ ጥናት ” ሲሆን የጥናቱም አባልም  
ነኝ። በተለይ የእርስዎ የመድኃኒት አጠቃቀም በጥናቱ ላይ በደንብ ከሚጠኑ ነጥቦች አንዱ  
ነው።

**የጥናቱ አላማ:-**

የዚህ ጥናት ዋና አላማው Imatinib(Gleevec) የህክምናው ውጤት ምን እንደሚመስል ፡  
መድኃኒት እንዴት እንደሚጠቀሙት፤ በታዘዘው መሰረት በአግባቡ እንዴት መድኃኒትዎን  
እንደሚወሰዱት እና መድኃኒትዎን ሁል ጊዜ እንዳይወሰዱ የሚያደርጉ ዋና ዋና ክፍተቶችን  
በመለየት፤ የመፍትሄ ሀሳቦችን ማቅረብ ነው።

**ከጥናቱ የሚጠበቁ ውጤቶች/ጥቅሞች**

በዚህ ጥናት ላይ የእርስዎ የሚጥል መድኃኒቶች በታዘዘው መሰረት በአግባቡ የአወሳሰድና  
የአጠቃቀም ክህሎት በደንብ ይጠናሉ። መድኃኒትዎን ሁል ጊዜ እንዳይወሰዱ የሚያደርጉ ዋና  
ዋና ክፍተቶችን በመለየት፤ የመፍትሄ ሀሳቦችን ማቅረብ ነው።በተጨማሪም ከጥናቱ በሚገኙ  
ግኝቶች የሚጥል ህክምና ውጤትን በተወሰነ መልኩ ለማሻሻል እንደሚቻል በመገመት፤ እርስዎ  
የጥቅሙ ተቋዳሽ ይሆናሉ ብለን እናምናለን። ስለዚህ የእርስዎ ቅንና ሐቀኛ መረጃ ለጥናቱ  
እጅግ በጣም ወሳኝ ነው።

**የተከበረ ጊዜዎ ስለሰጡን እጅግ በጣም እናመሰግንዎታለን።**



**ቅጽ 2: በቃለ መጠይቅ ለመሳተፍ የፈቃደኝነት ቃል መቀቢያ ቅጽ**

በCML ታካሚዎች ውጤት እንዲሁም ተያያዥ ጉዳዮች ላይ ያጠነጠነ እና ከመድሃኒቱ አወሳሰድ እንዲሁም ከህክምናው ጋር ተያይዘው ያሉ ችግሮችን በመቅረፍ የበሽታውን የህክምና ውጤት ለማሻሻል አላማ አድርጎ የተነሳ ጥናት ነው። መሰብሰቢያ ቅጹም ይህንኑ አላማ አድርጎ የተዘጋጀ ነው። በመሆኑም ከእርስዎ፣ ከእርስዎ ካርድ ላይ እና ከሀኪምዎ መረጃ ለመውሰድ እንፈልጋለን። በዚህ ጥናት ለመሳተፍም ሆነ ላለመሳተፍ መወሰንዎ በሆስፒታሉ ውስጥ ለሚያገኙት ማንኛውም አገልግሎት ላይ ምንም አይነት ተጽዕኖ የማይኖረው ሲሆን ተሳትፎዎንም በማንኛውም ሰዓት ማቆረጥ ወይም ጥያቄዎችን አለመመለስ ይችላሉ። በዚህ ጥናት የእርስዎ መረጃ ሙሉ በሙሉ በምስጥር የተጠበቀና ለምርምሩ አላማ ብቻ የሚወልድ ነው። በተጨማሪም የእርስዎ ተሳታፊነት በፈቃደኝነት የተመሠረተ ነው። የጥናቱ አላምድን ተረድተውና ጊዜዎን ሰውተው፤ ከ 10-15 ደቂቃዎች ለሚፈጅ ቃለ-መጠይቅ እውተኛው መረጃ ለመስጠት ፍቃደኛ በመሆንዎ በቅድሚያ አመሰግናለሁ። አዎ ከሆነ፣ ያስፈርሙ እና ይቀጥሉ፤ ካልሆነ ወደሚቀጥለው ተጠያቂ ይሂዱ።

---

የቃለ መጠይቅ የቀረበለት ሰው ፊርማ የቃለ መጠይቅ አቅራቢ ፊርማ

በየትኛው ጊዜ ጥያቄ ካለዎት አታላይ ሙሉ ብለው በ ስ.ቁ. (+251) -92295462 ወይም በ ኢ-ሜይል [atalay.mulu@aau.edu.et](mailto:atalay.mulu@aau.edu.et) ይጠይቁን።

**የተከበረ ጊዜዎ ስለሰጡን እጅግ በጣም እናመሰግንዎታለን።**

**ዋና አጥኚ:**

አዲስ አበባ ዩኒቨርሲቲ፣ ጤና ሳይንስ ኮሌጅ፣ ፋርማሲ ት/ቤት፣ ፋርማኮሎጂና ክሊኒካል ፋርማሲ ትምህርት ክፍል

ኢ-ሜይል: [atalay.mulu@aau.edu.et](mailto:atalay.mulu@aau.edu.et)

ስ/ቁ: 09 23 29 54 62

|                                                     |                                                          |                                           |                                           |
|-----------------------------------------------------|----------------------------------------------------------|-------------------------------------------|-------------------------------------------|
| <b>Socio-Demographic Characteristics</b>            |                                                          |                                           |                                           |
| <b>እድሜ:</b> _____ <b>(በዓመት)</b>                     |                                                          |                                           |                                           |
| <b>ፆታ:</b>                                          |                                                          |                                           |                                           |
| <input type="checkbox"/> ወንድ                        | <input type="checkbox"/> ሴት                              |                                           |                                           |
| <b>የጋብቻ ሁኔታ</b>                                     |                                                          |                                           |                                           |
| <input type="checkbox"/> ያላገባ/ች                     | <input type="checkbox"/> ያገባ/ች                           | <input type="checkbox"/> አግብታ/ቶ የፈታ/ች     | <input type="checkbox"/> ባል/ሚስት የሞተባት/ችበት |
| <b>የትምህርት ደረጃ</b>                                   |                                                          |                                           |                                           |
| <input type="checkbox"/> ማንበብም ሆነ/መፃፍ የማይችል         | <input type="checkbox"/> ማንበብም እና መፃፍ የሚችል ያለ ዘመናዊ ትምህርት |                                           |                                           |
| <input type="checkbox"/> የመጀመሪያ ደረጃ (1-8)           | <input type="checkbox"/> ሁለተኛ ደረጃ (9-12)                 |                                           |                                           |
| <input type="checkbox"/> ድህረ ምረቃ የጨረሰ/ች             | <input type="checkbox"/> ሌሎች _____                       |                                           |                                           |
| <b>የሚኖሩበት ቦታ</b>                                    |                                                          |                                           |                                           |
| <input type="checkbox"/> አዲስ አበባ                    | <input type="checkbox"/> ከአዲስ አበባ ወጭ                     |                                           |                                           |
| <b>የመጡበት ክልል:</b> _____ <b>(በፅሁፍ ይጻፍ)</b>           |                                                          |                                           |                                           |
| <b>ስራ</b>                                           |                                                          |                                           |                                           |
| <input type="checkbox"/> ስራ አጥ                      | <input type="checkbox"/> የቤት እመቤት                        | <input type="checkbox"/> ተማሪ              |                                           |
| <input type="checkbox"/> አርሶ/አርብቶ አደር               | <input type="checkbox"/> የቀን ስራተኛ                        | <input type="checkbox"/> ተቀጣሪ(ወርኃዊ ተከፋይ)  |                                           |
| <input type="checkbox"/> ነጋዴ                        | <input type="checkbox"/> ጡረተኛ                            | <input type="checkbox"/> ሌሎች [ይገለፁ] _____ |                                           |
| <b>ወርሀዊ የቤተሰብ ገቢ (ብብር):</b> _____ <b>(በቁጥር ይጻፍ)</b> |                                                          |                                           |                                           |
| <input type="checkbox"/> በጣም ዝቅተኛ ( $\leq 860$ ብር)  | <input type="checkbox"/> ከአማካይ በላይ (3001-5000 ብር)        |                                           |                                           |
| <input type="checkbox"/> ዝቅተኛ (861-1500 ብር)         | <input type="checkbox"/> ከፍተኛ ( $\geq 5001$ ብር)          |                                           |                                           |
| <input type="checkbox"/> አማካይ (1501-3000ብር)         |                                                          |                                           |                                           |

Part 1: ሞሪስኪ” መድኃኒትን በታዘዘው መሰረት በአግባቡ ስለመውሰድ” መለኪያ- 8  
 እርስዎ እነደነገሩን/ እነደሚታወቀው ለCML ማከሚያ የሚሆን Imatinib የሚባል መድሀኒት እየወሰዱ ይገኛሉ። ነገር ግን ይህንን ወይም ሌላ መድሀኒት የሚወስዱ ብዙ ሰዎች ከሚያጋጥማቸው እና ካላቸው ልምድ ሥለ መድሀኒት አወሳሰዳቸው ባህሪ ብዙ ነገር ስለሚሉ እኛ ደግሞ የእርስዎን ማለትም የImatinib መድሀኒት አወሳሰድ ባህሪ ለማወቅ እንፈልጋለን። ስለዚህ እባክዎትን እርስዎ የሚሰማዎትን ትክክለኛ ነገር በሚቀጥሉት መጠይቆች መሰረት ይንገሩን።

|   | <b>ሞሪስኪ” መድኃኒትን በታዘዘው መሰረት በአግባቡ ስለመውሰድ” መለኪያ- 8</b>                                                            | <b>አ</b>   | <b>አይደ</b> |
|---|-----------------------------------------------------------------------------------------------------------------|------------|------------|
|   | <b>ጥያቄዎች</b>                                                                                                    | <b>ዎ</b>   | <b>ለም</b>  |
|   |                                                                                                                 | <b>(0)</b> | <b>(1)</b> |
| 1 | አንዳንድ ጊዜ መድኃኒትዎን ረስተው ሳይወሰዱ ቀርተው ያውቃሉ?                                                                          |            |            |
| 2 | ሰዎች አንዳንድ ጊዜ ከመርሳት ውጪ ባሉት የተለያዩ ምክንያቶች መድኃኒታቸውን ሳይወስዱ ይቀራሉ። ባለፉት ሁለት ሳምንታት፣ መድኃኒትዎን ሳይወስዱ የቀሩበት ቀናቶች ነበሩ?       |            |            |
| 3 | ሐኪምዎን ሳይነግሩ፣ መድኃኒትዎን እየወሰዱ ህመም ሲባባስ፣ መድኃኒትዎን አቋርጠው ያውቃሉ?                                                        |            |            |
| 4 | በጉዞ ምክንያት ወይም ከቤትዎ አርቀው ሲጓዙ፣ አንዳንድ ጊዜ መድኃኒትዎን (ወደጉዞው) ረስተውት ሳይወስዱት ያውቃሉ?                                        |            |            |
| 5 | በትላንትናው ዕለት ሁሉንም መድኃኒትዎን ወስደውታል?                                                                                |            |            |
| 6 | ህመም ሲሻልዎት (የህመም ስሜቶች ሲጠፉ) አንዳንድ ጊዜ መድኃኒትዎን አቋርጠው ያውቃሉ?                                                          |            |            |
| 7 | በየቀኑ መድኃኒት መውሰድ፣ ለአንድ አንድሰዎች ምቹት አይሰጣቸውም። እርስዎ በየቀኑ፣ እንደሁም አንድም ሰዓት ሳያዛንፉ መድኃኒትዎን መውሰድዎ፣ የመሰላቸት ስሜት ተሰምቶት ያውቃል? |            |            |

|   |                                                                                                                                                                                                                                                                                                                                                                                                                                                                                     |  |  |
|---|-------------------------------------------------------------------------------------------------------------------------------------------------------------------------------------------------------------------------------------------------------------------------------------------------------------------------------------------------------------------------------------------------------------------------------------------------------------------------------------|--|--|
| 8 | <p>መድኃኒትዎን አስታውሰው ለመውሰድ ምን ያክል ይቸገራሉ?</p> <p><input type="checkbox"/> ጭራሽ ተቸግሮ አላወቅም(1)</p> <p><input type="checkbox"/> ዕለታት አንድ ጊዜ እቸገራለሁ (0.75)</p> <p><input type="checkbox"/> አልፎ አልፎ እቸገራለሁ (0.5)</p> <p><input type="checkbox"/> አብዛኛው ጊዜ እቸገራለሁ (0.25)</p> <p><input type="checkbox"/> ሁል ጊዜ እቸገራለሁ (0)</p> <p><input type="checkbox"/> Low (&lt;6)                      <input type="checkbox"/> Medium (6-&lt;8)                      <input type="checkbox"/> High(8)</p> |  |  |
|---|-------------------------------------------------------------------------------------------------------------------------------------------------------------------------------------------------------------------------------------------------------------------------------------------------------------------------------------------------------------------------------------------------------------------------------------------------------------------------------------|--|--|

**Part 2: መድሀኒትን በታዘዙት መሠረት/በትክክለኛው መንገድ እንዳይወስዱ ያደርጋሉ ተብለው የታሰቡ ችግሮችን ማወቂያ**

2.1. በሞርስኪ-8 መጠይቅ መልስ መሰረት Adherence level ከ8-በታች ላሉት ታካሚዎች የሚጠየቅ ጥያቄ፡ ከሚከተሉት የመድሀኒት አወሳሰድን ያወካሉ ተብለው ከተቀመጡ ምርጫዎች መካከል እርስዎን በታዘዙት መሰረት እንዳይወስዱ ያስቸገርዎት የትኞቹ ናቸው (ከአንድ በላይ መልስ ይቻላል)።

|                                                                                            |                                                               |
|--------------------------------------------------------------------------------------------|---------------------------------------------------------------|
| <input type="checkbox"/> በመርሳት                                                             | <input type="checkbox"/> ተስፋ በመቁረጥ                            |
| <input type="checkbox"/> በቸልተኝነት/በግዴለሽነት                                                   | <input type="checkbox"/> ሁሌ መድሀኒት መውሰድ ስለሚሰለቸኝ                |
| <input type="checkbox"/> ባህላዊ እና ኃይማኖታዊ በሆኑ ምክንያቶች ተጨማሪ ህክምና በመፈለግ፡ ህክምናውን ሙሉ በሙሉ ስለማላምንበት | <input type="checkbox"/> ህክምና ቦታ ያሉት የጤና ባለሙያዎች ድጋፍ ስለማያደርጉሊኝ |
| <input type="checkbox"/> ቤተሰቦቼ/ንጹህነት በተለያዩ ነገሮች ድጋፍ ስለማያደርጉሊኝ                              | <input type="checkbox"/> በመድኃኒቱ የጎንዮሽ ምክንያት                   |
| <input type="checkbox"/> የምመጣበት አካባቢ ሩቅ ስለሆነ በቀጠሮዎ ቀን ለመምጣት ገንዘብ ስለሚቸግረኝ                   | <input type="checkbox"/> ሌሎች ካሉ በፅሁፍ ይገለፅ<br>_____<br>_____   |

**2.2. Imatinib የተባለውን መድሀኒት ሲወሰድ ያጋጥማሉ የተባሉ የጎንዮሽ ጉዳዮችን ማወቂያቅፅ:**

**2.2.1. እባክዎትን መድሀኒቱን ሲወስዱ ወይም መወሰድ ከጀመሩ በኋላ ያጋጠምዎትን ችግሮች ይንገሩን(ከአንድ መልስ በላይ መልስ መመለስ ይቻላል)::**

- |                                       |                                                |
|---------------------------------------|------------------------------------------------|
| <input type="checkbox"/> የወገትዎት እብጠት  | <input type="checkbox"/> የማቅለሽለሽ ስሜት/ ማስታወክ    |
| <input type="checkbox"/> ድካም          | <input type="checkbox"/> ተቅማጥ                  |
| <input type="checkbox"/> ሰውነትን ማሳከክ?  | <input type="checkbox"/> የ ጨ ን ራ / የ ሆ ድ ህ መ ም |
| <input type="checkbox"/> ራስ ምታት       | <input type="checkbox"/> ሰውነት ማሳከክ             |
| <input type="checkbox"/> የመገጣጠሚያ ህመም  | <input type="checkbox"/> የቆዳ ቀለም መቀየር          |
| <input type="checkbox"/> የፊት ቆዳ ማፈገፈግ | <input type="checkbox"/> ሌሎች _____             |

**2.2.2. ከላይ በሰጡን መልስ መሰረት: የዘረዘሯቸዉ የጎንዮሽ ጉዳዮች የመድሀኒት አወሳሰድዎትን አወከዎት/በታዘዙት ትክክለኛ አወሳሰድ እንዳይወስዱ አድርጎዎት ነበር?**

- አዎ                       የለም

**2.2.3. ከላይ በ2.2.2. የሰጡት መልስ አዎ ከሆነ: ምን ያህል ጊዜ መድሀኒትዎትን ሳይወስዱ ቀርተዋል/ዘለዋል**

- |                                       |                                        |
|---------------------------------------|----------------------------------------|
| <input type="checkbox"/> ምንም አልዘለልኩም  | <input type="checkbox"/> አንዳንድ ጊዜ      |
| <input type="checkbox"/> ከዕለታት አንድ ጊዜ | <input type="checkbox"/> አብዛኛው ጊዜሁል ጊዜ |
